# Supplementary material for: Differential DNA methylation and CTCF binding between the ESR1 promoter a of MCF-7 and MDA-MB-231 breast cancer cells
Source: PubMed Central journal article supplement (PMC10796618; doi:10.1007/s11033-023-09171-0), 2024-01-18
Supplement: 11033_2023_9171_MOESM3_ESM.pdf [file 11033_2023_9171_MOESM3_ESM.pdf]

*Molecular Biology Reports*

*Differential DNA methylation and CTCF binding between the ESRI promoter A of  
MCF-7 and MDA-MB-231 breast cancer cells*

Edén Víctor Montes-de-Oca-Fuentes, Karina Jácome-López, Anaís Zarco-Mendoza,  
Georgina Guerrero, José Luis Ventura-Gallegos, Sergio Juárez-Méndez, Alberto Jose  
Cabrera-Quintero, Félix Recillas-Targa and Alejandro Zentella-Dehesa<sup>1-5\*</sup>

1. Departamento de Medicina Genómica y Toxicología Ambiental, Instituto de Investigaciones Biomédicas, Universidad Nacional Autónoma de México, 04510 Ciudad de México, México
2. Programa de Investigación en Cáncer de Mama, Instituto de Investigaciones Biomédicas, Universidad Nacional Autónoma de México, 04510 Ciudad de México, Mexico
3. Unidad de Bioquímica, Instituto Nacional de Ciencias Médicas y Nutrición Salvador Zubirán, 14080 Ciudad de México, México
4. Red de Apoyo a la Investigación, Universidad Nacional Autónoma de México-Instituto Nacional de Ciencias Médicas y Nutrición Salvador Zubirán, 14000 Ciudad de México, México
5. Cancer Center, American British Cowdray Medical Center, 01120 Ciudad de México, Mexico

\*Corresponding author: Alejandro Zentella-Dehesa, [azentell@biomedicas.unam.mx](mailto:azentell@biomedicas.unam.mx)

**Online Resource 3. Primers used in this report.**

| Name                                       | Sequence                                          | Region | Frag. Pb |
|--------------------------------------------|---------------------------------------------------|--------|----------|
| DNA methylation                            |                                                   |        |          |
| ESR-C1 Fw                                  | 5'-GGT GTT ATG TGT TTT GGG ATT TTG-3'             | -2875  | 341      |
| ESR -C1Rev                                 | 5'-CCA ACT AAA ATA TAA TAC TCC TCC ACT T-3'       | -2534  |          |
| ESR -C2 Fw                                 | 5'-TTG TTT TTT GTG AGT AGA TAG TAA GTT TTT-3'     | -2156  | 313      |
| ESR -C2Rev                                 | 5'-TCA AAA CAA ACC TAC CCT ACT AAA TC-3'          | -1843  |          |
| ESR -C3 Fw                                 | 5'-TTA ATT GAG TTA TTT ATG GAA AGG TTT GTG-3'     | -2605  | 359      |
| ESR -C3Rev                                 | 5'-CTA CTA CCA CCC CAA ACA AAA AAA A-3'           | -2246  |          |
| ESR -C5 Fw                                 | 5'-TAT TTG GAT ATT TGA TTT TGT ATA TTT TAG-3'     | -1043  | 280      |
| ESR -C5Rev                                 | 5'-AAT TCA AAA AAA CCT TTA ATT AAA AC-3'          | -763   |          |
| ESR -B1 Fw                                 | 5'-GGA AGA AAT TGA GGT TTT GGT AGG-3'             | -635   | 272      |
| ESR -B1Rev                                 | 5'-CTT TCT ATT TAA TTC CCC CTC-3'                 | -363   |          |
| ESR -A1 Fw                                 | 5'-CCT GAA GCT TGT TGT TAA ATA TAG TTG TTT GTG-3' | -585   | 571      |
| ESR -A1 Rev                                | 5'-CCT GAA GCT TAC CTC CAA CTT TAA ATA CTA ATC-3' | -14    |          |
| * ESR -A2 Fw                               | 5'-GAT TAG TAT TTA AAG TTG GAG GTT-3'             | -34    | 287      |
| * ESR -A2Rev                               | 5'-AAT ATA AAA AAT CAT AAT CAT AAT CC-3'          | +254   |          |
| ESR -EXON1 Fw                              | 5'-GTA TTT GGG ATG GTT TTA TTG TAT TAG-3'         | +258   | 281      |
| ESR -EXON1Rev                              | 5'-CTA TTA AAT AAA AAA AAA CCC CC-3'              | +538   |          |
| RT-PCR                                     |                                                   |        |          |
| ERa RT-Fw                                  | 5'-AGA CAT GAG AGC TGC CAA CC-3'                  |        | 299      |
| ERa RT-Rev                                 | 5'-GCC AGG CAC ATT CTA GAA GG-3'                  |        |          |
| CTCF RT-Fw                                 | 5'-GCC AGC AGG GAC ACA TAC AAG-3'                 |        | 217      |
| CTCF RT-Rev                                | 5'-GCT TTC GCA AGT GGA CAC C-3'                   |        |          |
| ActFw                                      | 5'-GTG GGG CGC CCC AGG CAC CA-3'                  |        | 540      |
| ActRev                                     | 5'-CTC CTT AAT GTC ACG CAC GAT TT-3'              |        |          |
| CHROMATIN IMMUNOPRECIPITATION ASSAY (ChIP) |                                                   |        |          |
| CTCF1Fw                                    | 5'-CCC ATG GAA CAT TTC TGG AA-3'                  | -1899  | 212      |
| CTCF1Rev                                   | 5'-GCA AAT GGC ACA AAG AAT CC-3'                  | -1687  |          |
| CTCF2Fw                                    | 5'-CTC AGA AGG TTG TGG AAG GGT-3'                 | -683   | 246      |

|            |                                     |      |     |
|------------|-------------------------------------|------|-----|
| CTCF2Rev   | 5'-CAC TGT AAC CGA GAT AGG GCA-3'   | -437 |     |
| Ex27RB Fw  | 5'-GGT ATG TAA CAG CGA CCG TGT G-3' |      | [1] |
| Ex27RB Rev | 5'-CTC TTC CTT GTT TGA GGT ATC C-3' |      |     |

#### References

1. Soto-Reyes E, Recillas-Targa F (2010) Epigenetic regulation of the human p53 gene promoter by the CTCF transcription factor in transformed cell lines. *Oncogene* 29:2217–27. <https://doi.org/10.1038/onc.2009.509>
